# Supplementary material for: Predominant but Previously-overlooked Prokaryotic Drivers of Reductive Nitrogen Transformation in Paddy Soils, Revealed by Metatranscriptomics
Source: PubMed Central journal article supplement (PMC5478542; doi:10.1264/jsme2.me16179), 2017-04-22
Supplement: 32_180_s1.pdf [file 32_180_s1.pdf]

## 1 **Supplementary information**

### 2 **Materials and methods**

#### 3 *Study field and soil sampling*

4           The paddy field examined in this study is located at Niigata Agricultural  
5 Research Institute (Nagaoka, Niigata, Japan: 37°26'N, 138°52'E). The soil type,  
6 cropping history, and soil physicochemical properties of the field were described  
7 previously (Itoh *et al.*, 2013). Field managements such as tilling, water management,  
8 fertilization, herbicide spraying in 2012, when we examined in this study, was basically  
9 same as those reported in our previous study (Itoh *et al.*, 2013).

10           Six transparent acrylic cores (10 × 15 cm; inner diameter × depth) were  
11 randomly placed in the plow layer (0 to 10 cm) at the furrow of the paddy field just after  
12 puddling on May 7th in 2012. Soil samples were collected at 2 time points, Jun 18th  
13 (waterlogged condition), and Oct 1st (drained condition), which showed the lowest and  
14 highest Eh in cultivation season, respectively (Fig. S1). At each sampling event, 3 cores  
15 were collected after removing the surface water, if any, and immediately frozen in  
16 liquid nitrogen, transported to the laboratory with dry ice, and stored at -80°C until use.  
17 Shallow and deep layers from a depth of 0 to 1 cm and 5 to 7 cm, respectively, were cut  
18 out from each frozen cylindrical soil by a sterilized knife. Each of soil samples  
19 contained three independent replicates.

20           Soil and sediment samples from a depth of 0 to 10 cm used for quantitative

21 PCR (qPCR) analyses were collected from paddy fields, upland fields, and river in  
22 various districts across the Japan ([Table S3](#)), and stored at -80°C until DNA extraction.

23

#### 24 *Preparation of soil RNA and DNA*

25 Four soil samples with triplicates (12 samples in total), which were shallow  
26 (S1, S3) and deep (S2, S4) layer samples obtained from soil cores collected in  
27 waterlogged (S1, S2) and drained (S3, S4) seasons, were subjected to RNA and DNA  
28 extraction and applied for metatranscriptomics and metagenomics in this study. Soil  
29 RNA and DNA were simultaneously extracted from 2 g (wet weight) of each soil  
30 sample using PowerSoil Total RNA Isolation Kit (MoBio Laboratories, Solana Beach,  
31 CA, USA) with PowerSoil DNA Elution Accessory Kit (MoBio Laboratories) (Itoh *et*  
32 *al.*, 2013). Crude RNA was purified using the TURBO DNA-free Kit (Applied  
33 Biosystems, Foster City, CA, USA) and RNA Clean & Concentrator (Zymo Research)  
34 as described previously (Itoh *et al.*, 2013). No contamination of DNA in prepared RNA  
35 was confirmed by PCR amplification using specific primers for bacterial 16S rRNA  
36 gene as described in *qPCR* section below. Crude DNA was purified using the RNase A  
37 (TAKARA BIO INC., Otsu, Shiga, Japan) and DNA Clean & Concentrator according to  
38 the manufacture's instruction (Zymo Research). Purity of the prepared RNA and DNA  
39 were determined using the NanoDrop ND-1000 spectrophotometer (NanoDrop  
40 Technologies, Wilmington, DE, USA) as described previously (Itoh *et al.*, 2013), and

41 RNA integrity was confirmed using the Agilent 2100 Bioanalyzer (Agilent  
42 Technologies, Palo Alto, CA, USA) with the RNA 6000 Pico Kit (Agilent  
43 Technologies). The quantity of the prepared RNA and DNA were measured using Qubit  
44 2.0 Fluorometer (Invitrogen, Carlsbad, CA, USA) with Qubit RNA Assay Kits  
45 (Invitrogen) and Qubit dsDNA HS Assay Kits (Invitrogen), respectively.

46 For qPCR analyses, soil and sediments DNA were extracted from 0.5 g (wet  
47 weight) of each sample using ISOIL for Beads Beating (Nippon Gene, Toyama, Japan)  
48 added with 0.02 g skim milk for improvement of extraction efficiency (Takada-Hoshino  
49 *et al.*, 2004). Purity and quantity of the prepared DNA was determined using the  
50 NanoDrop ND-1000 spectrophotometer (NanoDrop Technologies).

51

### 52 *Shotgun metatranscriptomic and metagenomic sequencing*

53 In order to perform the simultaneous assessment of community structure and  
54 function of soil microbes based on rRNA and mRNA (Urich *et al.*, 2008), total RNA  
55 was subjected to construction of complementary DNA (cDNA) libraries using the  
56 NEBNext Ultra RNA Library Prep Kit for Illumina (New England Biolabs Inc., Beverly,  
57 Massachusetts, USA). For metagenomic sequencing, prepared soil DNA was sheared  
58 into 300 bp fragments by the Covaris M220 (Covaris Inc., Woburn, MA, USA), and  
59 then DNA libraries for metagenomic sequencing was constructed using the fragmented  
60 DNA with the NEBNext Ultra DNA Library Prep Kit for Illumina (New England

61 Biolabs Inc.). Size distribution of cDNA and DNA libraries were checked on the  
62 Agilent 2100 Bioanalyzer (Agilent Technologies). Paired-end sequencing for all  
63 libraries was performed on an Illumina MiSeq sequencer (Illumina, San Diego, CA,  
64 USA) using a MiSeq Reagent kit v2 (Illumina) according to the manufacture's  
65 instruction.

66

#### 67 *Informatics and statistics*

68         Resulting paired-end sequences were joined together as described previously  
69 (Itoh *et al.*, 2014). Fastq-formatted data for the combined sequences were converted to  
70 fasta-formatted data with a Q-score cutoff of >30 using a PRINSEQ lite ver. 0.20.3  
71 (Schmieder and Edwards, 2011). Ribosomal RNA sequences in metatranscriptomic data  
72 were determined by BLAT search against the M5RNA database (e-value of  $<10^{-5}$ ,  
73 alignment length of >50 bp) on the MG-RAST server ver. 3.6 (Meyer *et al.*, 2008).  
74 Protein-coding genes transcripts were retrieved from metatranscriptomic data through  
75 BLAT search against the M5nr database (Wilke *et al.*, 2012) (e-value of  $<10^{-5}$ ,  
76 alignment length of >30 aa) on the MG-RAST server ver. 3.6 (Meyer *et al.*, 2008).  
77 From all of these assigned transcripts, sequences assigned as functional genes involved  
78 in reductive nitrogen transformation, i.e. *nar*, *nir*, *nor*, *nos*, *nrf*, and *nif* were collected  
79 and compared to the NCBI nr database in December 2015 by BLASTX search for more  
80 precise assignment (e-value of  $<10^{-5}$ ). Domain structure of query-tophit references was

81 confirmed by NCBI conserved domain search (Marchler-Bauer *et al.*, 2015), in order to  
82 assign based on not only reference name but also domain structure. To minimize the  
83 bias owing to differences of sequencing depth among libraries, the trimmed mean of M  
84 values (TMM) normalization method available in the edge R Bioconductor package was  
85 applied and used to calculate the normalized ratio of taxonomic composition of rRNA  
86 and functional genes involved in reductive nitrogen transformations (Robinson *et al.*,  
87 2010). Mann-Whitney *U* test was performed using R software ver. 3.0.1 (R  
88 Development Core Team, 2008) to analyze qPCR results.

89

90 *qPCR*

91 qPCR was performed to amplify 16S rRNA genes of all bacteria, *Geobacter*,  
92 and *Anaeromyxobacter* using the StepOnePlus System (Life Technologies, Carlsbad,  
93 CA, USA) with the SYBR Premix EX Taq II (TAKARA BIO INC.). The reaction  
94 mixture was comprised of 1× SYBR Premix Ex Taq II, 0.2 μM forward and reverse  
95 primer pairs (338F and 518R for all bacteria (Klammer, *et al.*, 2008), 494F and  
96 Geo825R for *Geobacter* (Holmes *et al.*, 2002; Anderson *et al.*, 1998), Ade399F and  
97 Ade466R for *Anaeromyxobacter* (Thomas, 2009)), 0.5 μg/μl BSA, and soil DNA as a  
98 template. The PCR conditions were as follows: initial denaturation at 95°C for 30 s,  
99 followed by 40 cycles of 95°C for 5 s, 55°C for 30 s (for all bacteria) or 50°C for 20 s  
100 (for *Geobacter* and *Anaeromyxobacter*), and 72°C for 30 s. Copies numbers of 16S

101 rRNA genes of all bacteria, *Geobacter*, and *Anaeromyxobacter* were calculated on the  
102 basis of the standard curve constructed using a dilution series of the targeted PCR  
103 products of *Pseudomonas stutzeri* JCM 5965, *Geobacter sulfurreducens* JCM 18752, or  
104 *Anaeromyxobacter dehalogenas* 2CP-C ATCC BAA-259, respectively.

105

106 *Nucleotide sequence accession number*

107 All of metatranscriptomic and metagenomic sequences reported in this study  
108 were deposited in the MG-RAST database (<http://metagenomics.anl.gov/>, Meyer *et al.*,  
109 2008). Deposit IDs were summarized in [Tables S4 and S5](#).

110

111 **References**

- 112 Anderson, R.T., J. N. Rooney-Verga, C.V. Gaw, and D.R. Lovley. 1998. Anaerobic  
113 benzene oxidation in the Fe(III) reduction zone of petroleum-contaminated aquifers.  
114 Environ. Sci. Technol. 32: 1222–1229.
- 115 Bazylynski, D.A., A.J. Dean, D. Schüler, E.J. Phillips, and D.R. Lovley. 2000.  
116 N<sub>2</sub>-dependent growth and nitrogenase activity in the metal-metabolizing bacteria,  
117 *Geobacter* and *Magnetospirillum* species. Environ. Microbiol. 2: 266–273.
- 118 Klammer, S., B. Knapp, H. Insam, M.T. Dell’Abate, and M. Ros. 2008. Bacterial  
119 community patterns and thermal analyses of composts of various origins. Waste.  
120 Manag. Res. 26: 173–187.
- 121 Itoh, H., S. Ishii, Y. Shiratori, K. Oshima, S. Otsuka, M. Hattori, and K. Senoo. 2013.  
122 Seasonal transition of active bacterial and archaeal communities in relation to water  
123 management in paddy soils. Micobes Environ. 28: 370–380.
- 124 Itoh, H., M. Aita, A. Nagayama, X.Y. Meng, Y. Kamagata, R. Navarro, T. Hori, S.  
125 Ohgiya, and Y. Kikuchi. 2014. Evidence of environmental and vertical  
126 transmission of *Burkholderia Symbionts* in the oriental chinch bug, *Cavelerius*  
127 *saccharivorus* (Heteroptera: Blissidae). Appl. Environ. Microbiol. 80: 5974–5083.
- 128 Holmes, D.E., K.T. Finneran, R.A. O’neil, and D.R.Lovley. 2002. Enrichment of  
129 members of the family *Geobacteraceae* associated with stimulation of dissimilatory  
130 metal reduction in uranium-contaminated aquifer sediments. Appl. Environ.

131 Microbiol. 68: 2300–2306.

132 Marchler-Bauer, A., M.K. Derbyshire, N.R. Gonzales, et al. 2015. CDD: NCBI's  
133 conserved domain database. Nucleic Acids Res. 43: D222–226.

134 Methé, B. A., J. Webster, K. Nevin, J. Butler, and D.R. Lovley. 2005. DNA microarray  
135 analysis of nitrogen fixation and Fe (III) reduction in *Geobacter sulfurreducens*.  
136 Appl. Environ. Microbiol. 71: 2530–2538.

137 Meyer, F., D. Paarmann, M. D'Souza, et al. 2008. The metagenomics RAST server - a  
138 public resource for the automatic phylogenetic and functional analysis of  
139 metagenomes. BMC Bioinformatics. 19: 386.

140 Nevin, K.P., D.E. Holmes, T.L. Woodard, S.F. Covalla, and D.R. Lovley. 2007.  
141 Reclassification of *Trichlorobacter thiogenes* as *Geobacter thiogenes* comb. nov.  
142 Int. J. Syst. Evol. Microbiol. 57: 463–466.

143 R-Development-Core-Team. 2008. R: A language and environment for statistical  
144 computing. R Foundation for Statistical Computing, Vienna, Austria.

145 Robinson, M.D., D.J. McCarthy, and G.K. Smyth. 2010. edgeR: a Bioconductor  
146 package for differential expression analysis of digital gene expression data.  
147 Bioinformatics. 26: 139–140.

148 Sanford, R.A., J.R. Cole, and J.M. Tiedje. 2002. Characterization and Description of  
149 *Anaeromyxobacter dehalogenans* gen. nov., sp. nov., an Aryl-Halorespiring  
150 Facultative Anaerobic Myxobacterium. Appl. Environ. Microbiol. 68: 893–900.



151 Sanford, R.A., D.D. Wagner, Q. Wu, et al. 2012. Unexpected nondenitrifier nitrous  
152 oxide reductase gene diversity and abundance in soils. Proc. Natl. Acad. Sci. USA.  
153 109: 19709–19714.

154 Schmieder, R., and R. Edwards. 2011. Quality control and preprocessing of  
155 metagenomic datasets. Bioinformatics. 27: 863–864.

156 Sung, Y., K.E. Fletcher, K.M. Ritalahti, R.P. Apkarian, N. Ramos-Hernandez, R.A.  
157 Sanford, N.M. Mesbah, and F.E. Löffler. 2006. *Geobacter lovleyi* sp. nov. strain SZ,  
158 a novel metal-reducing and tetrachloroethene-dechlorinating bacterium. Appl.  
159 Environ. Microbiol. 72: 2775–2782.

160 Takada-Hoshino, Y., and N. Matsumoto. 2004. An improved DNA extraction method  
161 using skim milk from soils that strongly adsorb DNA. Microb. Environ. 19: 13–19.

162 Thomas, S.H. 2009. Ecophysiology and diversity of *Anaeromyxobacter* spp. and  
163 implications for uranium bioremediation. Ph.D. thesis. Georgia Institute of  
164 Technology, GA, USA.

165 Urich, T., A. Lanzén, J. Qi, D.H. Huson, C. Schleper, and S.C. Schuster. 2008.  
166 Simultaneous assessment of soil microbial community structure and function  
167 through analysis of the meta-transcriptome. PloS One. 3: e2527.

168 Wilke, A., T. Harrison, J. Wilkening, D. Field, E.M. Glass, N. Kyrpides, K.  
169 Mavrommatis, and F. Meyer. 2012. The M5nr: a novel non-redundant database  
170 containing protein sequences and annotations from multiple sources and associated

171 tools. BMC Bioinformatics. 13: 141.

172

173

174 **Supplementary figure legends**

175 **Fig. S1**

176 Seasonal changes of soil redox potential (Eh) and water management. Eh at 5 cm depth  
177 was measured using 5 replicate platinum-tipped electrodes as described previously (Itoh  
178 *et al.*, 2013). Data in 2009 was derived from our previous study (Itoh *et al.*, 2013).  
179 Asterisks indicate soil samples used for metatranscriptomics in this study.

180

181 **Fig. S2**

182 Microbial diversity of RNT genes and rRNA gene detected in metagenomics of the  
183 present study. Taxonomic distribution of *nar*, *nir*, *nor*, *nos*, *nrf*, and *nif*, and rRNA gene  
184 at phylum- and proteobacterial class-level (A), and deltaproteobacterial genus-level (B).  
185 Sample IDs indicate data derived from paddy soils in shallow (S1, S3) and deep (S2,  
186 S4) layers under waterlogged (S1, S2) and drained (S3, S4) conditions.

187

188 **Fig. S3**

189 Nif gene clusters conserved in genome of *Anaeromyxobacter* spp. and diazotrophs.

190

# Fig. S1

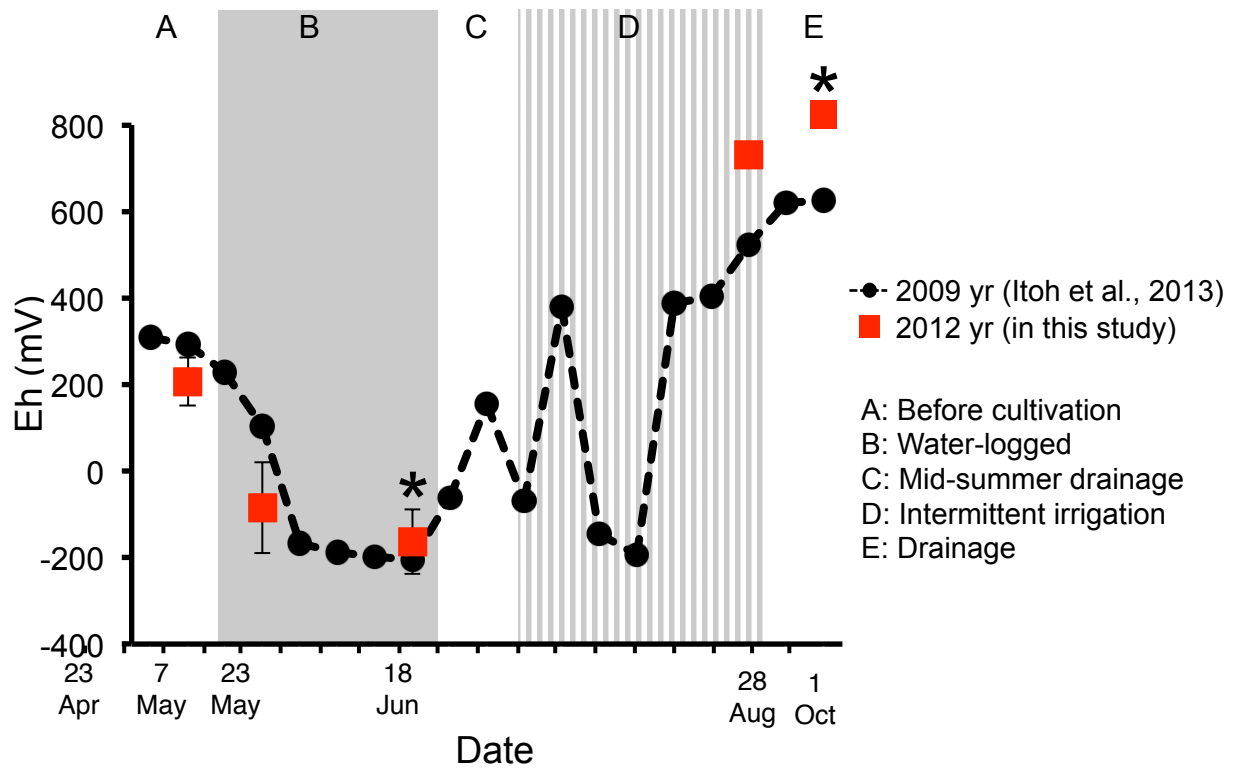

# Fig. S2

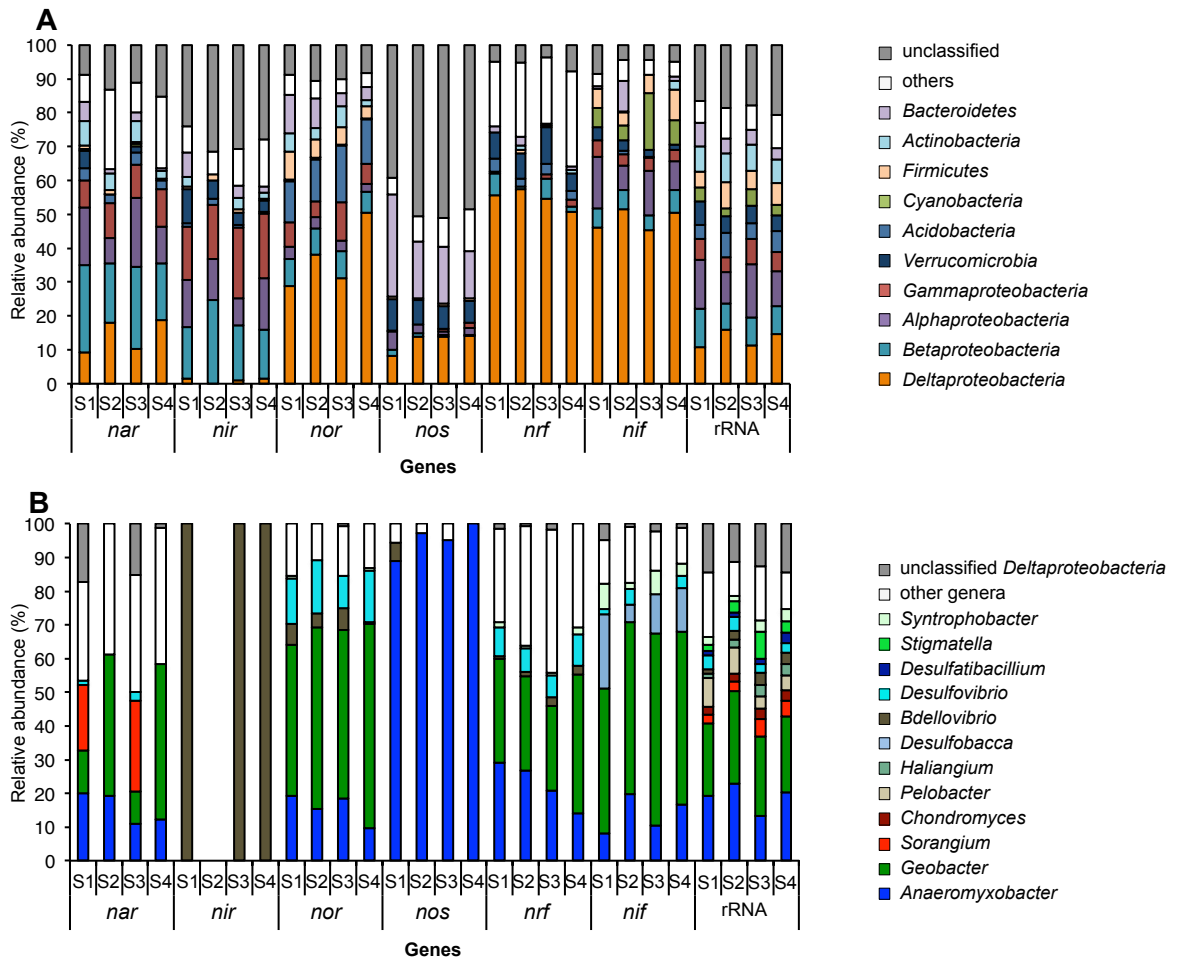

# Fig. S3

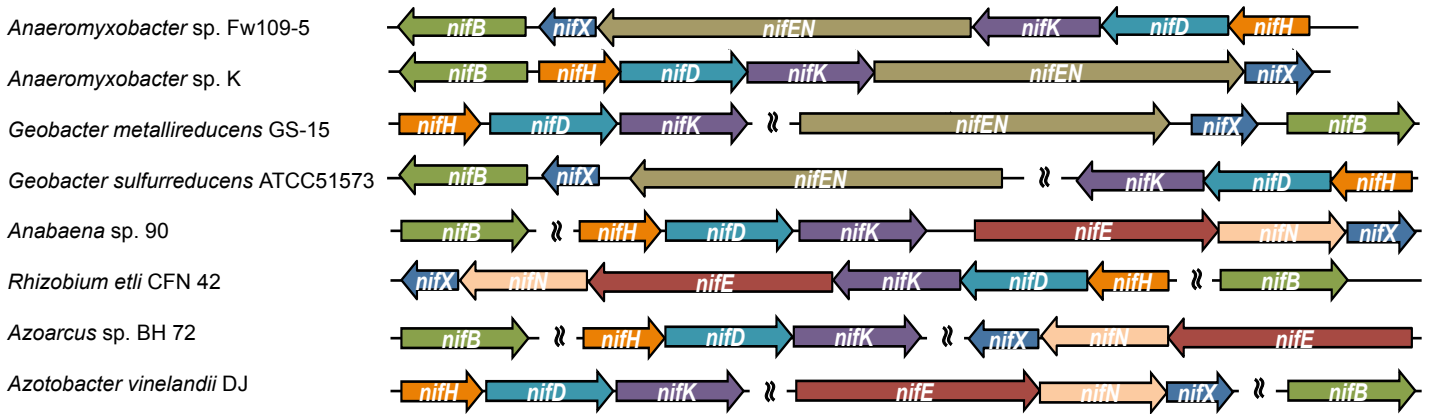

Table S1 RNT activities of *Geobacter* and *Anaeromyxobacter* reported in previous studies.

| Organisms               | NOR (NO → N <sub>2</sub> O) | NOS (N <sub>2</sub> O → N <sub>2</sub> ) | References reporting RNT activities                                 |                                                                    |
|-------------------------|-----------------------------|------------------------------------------|---------------------------------------------------------------------|--------------------------------------------------------------------|
|                         |                             |                                          | DNRA (NO <sub>3</sub> <sup>-</sup> → NH <sub>4</sub> <sup>+</sup> ) | Nitrogen fixation (N <sub>2</sub> → NH <sub>4</sub> <sup>+</sup> ) |
| <i>Geobacter</i>        | ND <sup>a</sup>             | – <sup>b</sup>                           | Sung et al., 2006; Nevin et al., 2007                               | Bazylinski et al., 2000; Methé et al., 2005                        |
| <i>Anaeromyxobacter</i> | ND <sup>a</sup>             | Sanford et al., 2012                     | Sanford et al., 2002                                                | ND <sup>a,c</sup>                                                  |

<sup>a</sup> ND, no data.

<sup>b</sup> None of *Geobacter* spp. harbor *nos* in their genome.

<sup>c</sup> *Anaeromyxobacter* sp. FW109-5 and K have similar *nif* cluster to that of *Geobacter metallireducens* GS-15 and *Geobacter sulfurreducens* ATCC51573 having nitrogen fixation activity (Bazylinski et al., 2000, Methé et al., 2005), shown in Fig. S3.

Table S2 GC content of *norB*, *nosZ*, *nrfA*, *nifH*, 16S rRNA gene, and genome of *Anaeromyxobacter* spp. and other genera.

| Phylum/Proteobacterial class | Organisms                                                       | GC content % |             |             |             |          |        | Accession No. |
|------------------------------|-----------------------------------------------------------------|--------------|-------------|-------------|-------------|----------|--------|---------------|
|                              |                                                                 | <i>norB</i>  | <i>nosZ</i> | <i>nrfA</i> | <i>nifH</i> | 16S rRNA | genome |               |
| <i>Deltaproteobacteria</i>   | <i>Anaeromyxobacter dehalogenans</i> 2CP-1                      | 71.2         | 67.4        | 70.1        | -           | 58.6     | 74.8   | CP001359      |
| <i>Deltaproteobacteria</i>   | <i>Anaeromyxobacter dehalogenans</i> 2CP-C                      | 71.2         | 67.4        | 69.6        | -           | 58.6     | 74.9   | NC007760      |
| <i>Deltaproteobacteria</i>   | <i>Anaeromyxobacter</i> sp.Fw109-5                              | 70.6         | 67.2        | 68.6        | 67.4        | 58.6     | 73.5   | CP000769      |
| <i>Deltaproteobacteria</i>   | <i>Anaeromyxobacter</i> sp.K                                    | 71.1         | 67.2        | 70.1        | 67.8        | 58.5     | 74.4   | CP001131      |
| <i>Deltaproteobacteria</i>   | <i>Geobacter pickeringii</i> G13                                | 66.0         | -           | 65.6        | 61.6        | 56.4     | 62.3   | CP009788      |
| <i>Deltaproteobacteria</i>   | <i>Geobacter sulfurreducens</i> KN400                           | -            | -           | 62.1        | 60.8        | 55.9     | 61.0   | CP002031      |
| <i>Deltaproteobacteria</i>   | <i>Geobacter</i> sp.M21                                         | 60.6         | -           | 61.8        | 61.8        | 55.0     | 60.5   | CP001661      |
| <i>Deltaproteobacteria</i>   | <i>Geobacter bemidjiensis</i> Bem                               | 59.6         | -           | 61.0        | 61.7        | 55.1     | 60.3   | CP001124      |
| <i>Deltaproteobacteria</i>   | <i>Geobacter metallireducens</i> GS-15                          | 65.1         | -           | 61.9        | 58.1        | 56.4     | 59.6   | CP000148      |
| <i>Deltaproteobacteria</i>   | <i>Geobacter lovleyi</i> SZ                                     | -            | -           | 49.8        | 54.4        | 54.2     | 54.8   | CP001089      |
| <i>Deltaproteobacteria</i>   | <i>Geobacter daltonii</i> FRC-32                                | 55.5         | -           | 54.5        | 59.5        | 54.7     | 53.5   | CP001390      |
| <i>Deltaproteobacteria</i>   | <i>Desulfovibrio vulgaris</i> Miyazaki F                        | -            | -           | 61.3        | 62.2        | 57.4     | 67.1   | CP001197      |
| <i>Deltaproteobacteria</i>   | <i>Desulfobacterium autotrophicum</i> HRM2                      | -            | -           | -           | 53.5        | 52.2     | 48.8   | CP001087      |
| <i>Deltaproteobacteria</i>   | <i>Desulfobacca acetoxidans</i> DSM 11109                       | -            | -           | -           | 53.7        | 55.7     | 52.9   | CP002629      |
| <i>Deltaproteobacteria</i>   | <i>Syntrophobacter fumaroxidans</i> MPOB                        | 56.6         | -           | 59.1        | 58.9        | 57.0     | 59.9   | CP000478      |
| <i>Deltaproteobacteria</i>   | <i>Desulfomonile tiedjei</i> DSM 6799                           | 50.0         | 53.7        | -           | 50.8        | 55.9     | 50.1   | CP003360      |
| <i>Bacteroidetes</i>         | <i>Bacteroides cellulosilyticus</i> ASM 131834v1                | -            | -           | 47.6        | -           | 50.5     | 42.7   | CP012801      |
| <i>Gammaproteobacteria</i>   | <i>Shewanella oneidensis</i> MR-1                               | -            | -           | 44.9        | -           | 54.8     | 45.9   | NC004347      |
| <i>Gammaproteobacteria</i>   | <i>Escherichia coli</i> K-12 MG 1655                            | -            | -           | 52.3        | -           | 54.4     | 50.8   | NC000913      |
| <i>Gammaproteobacteria</i>   | <i>Thioalkalivibrio nitratireducens</i> DSM 14787               | 61.0         | 64.7        | 62.6        | -           | 56.3     | 66.5   | CP003989      |
| <i>Gammaproteobacteria</i>   | <i>Salmonella enterica</i> , serovar <i>Typhimurium</i> SL 1344 | -            | -           | 54.0        | -           | 54.4     | 52.2   | NC016810      |
| <i>Epsilonproteobacteria</i> | <i>Sulfurospirillum deleyianum</i> DSM 6946                     | -            | -           | 40.7        | -           | 49.2     | 39.0   | CP001816      |
| <i>Epsilonproteobacteria</i> | <i>Wolinella succinogenes</i> DSM 1740                          | -            | 48.3        | 49.0        | 49.0        | 51.7     | 48.5   | BX571656      |
| <i>Firmicutes</i>            | <i>Clostridium acetivum</i> ASM 104271v1                        | -            | -           | 40.3        | 37.5        | 54.5     | 35.3   | CP009687      |
| <i>Firmicutes</i>            | <i>Desulfitobacterium dehalogenans</i> ATCC 51507               | 45.9         | 47.4        | 50.2        | 53.6        | 53.9     | 45.0   | CP003348      |
| <i>Cyanobacteria</i>         | <i>Anabaena cylindrica</i> PCC 7122                             | -            | -           | -           | 42.3        | 53.7     | 38.8   | CP003659      |
| <i>Cyanobacteria</i>         | <i>Anabaena</i> sp. 90                                          | -            | -           | -           | 44.1        | 53.3     | 38.1   | CP003284      |
| <i>Cyanobacteria</i>         | <i>Nostoc</i> sp. PCC 7120                                      | -            | -           | -           | 47.4        | 53.9     | 41.3   | BA000019      |
| <i>Cyanobacteria</i>         | <i>Cyanothece</i> sp. ATCC 51142                                | -            | -           | -           | 45.1        | 54.5     | 38.0   | CP000806      |
| <i>Actinobacteria</i>        | <i>Frankia</i> sp. Ccl 3                                        | -            | -           | -           | 64.1        | 60.4     | 70.1   | CP000249      |
| <i>Alphaproteobacteria</i>   | <i>Bradyrhizobium japonicum</i> USDA 6                          | 59.8         | 60.9        | -           | 55.0        | 55.6     | 63.7   | AP012206      |
| <i>Alphaproteobacteria</i>   | <i>Sinorhizobium meliloti</i> 1021                              | 60.6         | 60.4        | -           | 58.2        | 55.4     | 62.0   | NC003047      |
| <i>Alphaproteobacteria</i>   | <i>Rhizobium etli</i> CFN 42                                    | 58.9         | -           | -           | 59.8        | 55.7     | 61.3   | CP000133      |
| <i>Alphaproteobacteria</i>   | <i>Mesorhizobium loti</i> MAFF 303099                           | -            | -           | -           | 60.5        | 56.1     | 62.5   | BA000012      |
| <i>Alphaproteobacteria</i>   | <i>Azospirillum thiophilum</i> ASM 130559v1                     | 62.7         | -           | -           | 64.3        | 57.8     | 68.2   | CP012401      |
| <i>Alphaproteobacteria</i>   | <i>Rhodobacter sphaeroides</i> ATCC 17025                       | 62.9         | 65.0        | -           | 63.8        | 56.0     | 68.5   | CP000661      |
| <i>Betaproteobacteria</i>    | <i>Azoarcus</i> sp.BH 72                                        | 63.8         | 64.7        | -           | 62.6        | 55.5     | 67.9   | AM406670      |
| <i>Betaproteobacteria</i>    | <i>Herbaspirillum seropedicae</i> ASM 104094v1                  | -            | -           | -           | 61.7        | 53.5     | 63.4   | CP011930      |
| <i>Gammaproteobacteria</i>   | <i>Methylomonas denitrificans</i> FJG 1                         | 55.1         | -           | -           | 49.3        | 53.3     | 51.7   | CP011476      |
| <i>Gammaproteobacteria</i>   | <i>Azotobacter vinelandii</i> DJ                                | -            | -           | -           | 59.0        | 55.8     | 65.7   | CP001157      |
| <i>Gammaproteobacteria</i>   | <i>Klebsiella pneumoniae</i> 342                                | 61.1         | -           | -           | 58.2        | 54.7     | 57.3   | CP003200      |



Table S3 Soli samples used in qPCR analyses.

| Sample ID       | Environment <sup>e</sup> | Collection site            | Collection year | Collector   | No. of copies/g-sample      |                             |                             |
|-----------------|--------------------------|----------------------------|-----------------|-------------|-----------------------------|-----------------------------|-----------------------------|
|                 |                          |                            |                 |             | All bacteria                | <i>Geobacter</i>            | <i>Anaeromyxobacter</i>     |
| P1              | Paddy                    | Sapporo, Hokkaido pref.    | 2011            | T. Shinano  | $7.11 \pm 0.73 \times 10^9$ | $2.02 \pm 0.47 \times 10^8$ | $1.08 \pm 0.18 \times 10^8$ |
| P2              | Paddy                    | Kooriyama, Fukushima pref. | 2011            | H. Itoh     | $1.83 \pm 0.22 \times 10^9$ | $1.72 \pm 0.26 \times 10^7$ | $1.32 \pm 0.10 \times 10^7$ |
| P3 <sup>a</sup> | Paddy                    | Nagaoka, Niigata pref.     | 2009            | H. Itoh     | $5.99 \pm 0.98 \times 10^9$ | $1.36 \pm 0.22 \times 10^8$ | $8.51 \pm 0.21 \times 10^7$ |
| P4 <sup>b</sup> | Paddy                    | Nagaoka, Niigata pref.     | 2009            | H. Itoh     | $3.48 \pm 0.91 \times 10^9$ | $1.15 \pm 0.18 \times 10^8$ | $2.46 \pm 0.24 \times 10^7$ |
| P5              | Paddy                    | Tsukuba, Ibaraki pref.     | 2011            | T. Hasegawa | $3.82 \pm 0.32 \times 10^9$ | $5.66 \pm 0.61 \times 10^7$ | $8.30 \pm 1.00 \times 10^7$ |
| P6              | Paddy                    | Tanashi, Tokyo pref.       | 2011            | H. Itoh     | $1.49 \pm 0.20 \times 10^9$ | $1.02 \pm 0.14 \times 10^7$ | $8.57 \pm 0.18 \times 10^6$ |
| P7              | Paddy                    | Nagoya, Aichi pref.        | 2011            | S. Asakawa  | $4.31 \pm 0.39 \times 10^9$ | $2.65 \pm 0.15 \times 10^8$ | $7.03 \pm 0.31 \times 10^7$ |
| P8              | Paddy                    | Tsu, Mie pref.             | 2011            | H. Obata    | $6.65 \pm 1.03 \times 10^9$ | $7.30 \pm 0.87 \times 10^7$ | $7.95 \pm 0.81 \times 10^7$ |
| U1              | Upland (arable)          | Sapporo, Hokkaido pref.    | 2016            | H. Itoh     | $3.01 \pm 0.76 \times 10^9$ | $1.77 \pm 0.10 \times 10^7$ | $4.21 \pm 1.45 \times 10^6$ |
| U2              | Upland (grass)           | Sapporo, Hokkaido pref.    | 2016            | H. Itoh     | $1.61 \pm 0.11 \times 10^9$ | $5.65 \pm 0.69 \times 10^6$ | $7.15 \pm 0.29 \times 10^5$ |
| U3              | Upland (forest)          | Sapporo, Hokkaido pref.    | 2016            | H. Itoh     | $1.16 \pm 0.06 \times 10^9$ | $2.92 \pm 0.11 \times 10^6$ | $5.36 \pm 0.53 \times 10^5$ |
| U4 <sup>c</sup> | Upland (arable)          | Nagaoka, Niigata pref.     | 2010            | H. Itoh     | $1.01 \pm 0.19 \times 10^9$ | $5.34 \pm 0.99 \times 10^6$ | $4.88 \pm 0.31 \times 10^6$ |
| U5 <sup>d</sup> | Upland (arable)          | Nagaoka, Niigata pref.     | 2009            | H. Itoh     | $1.37 \pm 0.29 \times 10^9$ | $2.47 \pm 0.40 \times 10^6$ | $3.72 \pm 0.58 \times 10^6$ |
| U6              | Upland (arable)          | Tsukuba, Ibaraki pref.     | 2011            | H. Akiyama  | $4.70 \pm 0.30 \times 10^8$ | $5.81 \pm 0.65 \times 10^5$ | $5.47 \pm 0.15 \times 10^5$ |
| U7              | Upland (grass)           | Bukyo-ku, Tokyo pref.      | 2016            | Y. Masuda   | $3.29 \pm 0.22 \times 10^9$ | $8.55 \pm 0.42 \times 10^6$ | $1.07 \pm 0.07 \times 10^6$ |
| U8              | Upland (arable)          | Kanonji, Kagawa pref.      | 2015            | H. Itoh     | $1.71 \pm 0.36 \times 10^9$ | $1.72 \pm 0.11 \times 10^7$ | $4.06 \pm 2.01 \times 10^4$ |
| RS1             | River sediment           | Joestu, Niigata pref.      | 2015            | H. Itoh     | $2.04 \pm 0.20 \times 10^8$ | $8.20 \pm 0.35 \times 10^6$ | $2.65 \pm 0.23 \times 10^6$ |
| RS2             | River sediment           | Shunan, Yamaguchi pref.    | 2015            | H. Itoh     | $6.85 \pm 0.46 \times 10^8$ | $1.86 \pm 0.14 \times 10^7$ | $2.44 \pm 0.13 \times 10^6$ |
| RS3             | River sediment           | Onga-gun, Fukuoka pref.    | 2015            | H. Itoh     | $6.23 \pm 0.26 \times 10^8$ | $2.23 \pm 0.10 \times 10^7$ | $3.21 \pm 0.19 \times 10^6$ |
| RS4             | River sediment           | Kanzaki, Saga pref.        | 2015            | H. Itoh     | $6.56 \pm 0.34 \times 10^8$ | $1.85 \pm 0.16 \times 10^7$ | $3.04 \pm 0.21 \times 10^6$ |
| RS5             | River sediment           | Kusu-gun, Oita pref.       | 2015            | H. Itoh     | $4.52 \pm 0.56 \times 10^8$ | $1.27 \pm 0.16 \times 10^7$ | $2.36 \pm 0.37 \times 10^6$ |
| RS6             | River sediment           | Tamana, Kumamoto pref.     | 2015            | H. Itoh     | $1.06 \pm 0.05 \times 10^9$ | $2.45 \pm 0.15 \times 10^7$ | $4.05 \pm 0.29 \times 10^6$ |

<sup>a</sup> Collected from the same paddy field used for metatranscriptomics and metagenomics in this study.

<sup>b</sup> Two years after transformed from upland arabele field.

<sup>c</sup> One year after transformed from paddy field, P4.

<sup>d</sup> Two years after transformed from paddy field.

<sup>e</sup> All paddy soils were collected from waterlogged fields.

Table S4 Summary of metatranscriptomics in all soil samples.

| Soil ID | Replicate | No. of sequences                 |           |                      |            |            |            |            |            |            | MG-RAST ID |
|---------|-----------|----------------------------------|-----------|----------------------|------------|------------|------------|------------|------------|------------|------------|
|         |           | total (length <sup>a</sup> (bp)) | rRNA      | Protein coding genes | <i>nar</i> | <i>nir</i> | <i>nor</i> | <i>nos</i> | <i>nif</i> | <i>nrf</i> |            |
| S1      | 1         | 7,240,814 (175±35)               | 6,413,363 | 20,353               | 0          | 0          | 2          | 0          | 1          | 0          | 4675403.3  |
|         | 2         | 6,017,177 (173±37)               | 5,322,206 | 17,066               | 6          | 1          | 1          | 2          | 2          | 3          | 4675404.3  |
|         | 3         | 6,968,767 (176±38)               | 6,171,594 | 18,163               | 12         | 2          | 1          | 0          | 0          | 3          | 4675402.3  |
| S2      | 1         | 5,667,389 (182±37)               | 4,897,849 | 69,750               | 53         | 14         | 22         | 18         | 18         | 24         | 4678309.3  |
|         | 2         | 5,170,274 (186±37)               | 4,523,846 | 73,085               | 66         | 4          | 14         | 14         | 7          | 20         | 4678318.3  |
|         | 3         | 6,301,014 (187±36)               | 5,577,772 | 85,997               | 84         | 8          | 25         | 10         | 13         | 26         | 4678319.3  |
| S3      | 1         | 5,917,478 (196±35)               | 5,391,967 | 22,823               | 8          | 0          | 2          | 2          | 2          | 0          | 4675332.3  |
|         | 2         | 7,284,668 (200±34)               | 6,595,453 | 37,417               | 23         | 5          | 5          | 0          | 3          | 4          | 4675331.3  |
|         | 3         | 5,699,284 (191±35)               | 4,818,110 | 153,931              | 107        | 20         | 58         | 28         | 14         | 20         | 4675333.3  |
| S4      | 1         | 7,264,805 (187±33)               | 5,970,105 | 18,628               | 17         | 5          | 2          | 13         | 0          | 3          | 4669534.3  |
|         | 2         | 5,000,890 (191±34)               | 3,893,485 | 13,987               | 13         | 2          | 0          | 4          | 1          | 4          | 4669537.3  |
|         | 3         | 6,969,617 (177±33)               | 4,304,930 | 19,777               | 15         | 3          | 6          | 3          | 2          | 0          | 4669538.3  |

<sup>a</sup> ave. ± std.

Table S5 Summary of metagenomics in all soil samples.

| Soil ID | Replicate | No. of sequences                 |       |                      |            |            |            |            |            |            | MG-RAST ID |
|---------|-----------|----------------------------------|-------|----------------------|------------|------------|------------|------------|------------|------------|------------|
|         |           | total (length <sup>a</sup> (bp)) | rRNA  | Protein coding genes | <i>nar</i> | <i>nir</i> | <i>nor</i> | <i>nos</i> | <i>nif</i> | <i>nrf</i> |            |
| S1      | 1         | 1,956,714 (216±48)               | 3,492 | 594,728              | 435        | 70         | 125        | 52         | 81         | 59         | 4670910.3  |
|         | 2         | 1,752,612 (240±49)               | 2,384 | 672,120              | 582        | 78         | 208        | 75         | 96         | 92         | 4670906.3  |
|         | 3         | 1,442,786 (232±48)               | 2,242 | 493,372              | 427        | 55         | 140        | 66         | 67         | 55         | 4670911.3  |
| S2      | 1         | 1,220,590 (255±47)               | 1,313 | 514,192              | 321        | 45         | 178        | 74         | 136        | 77         | 4670909.3  |
|         | 2         | 2,016,318 (249±49)               | 2,048 | 829,603              | 457        | 14         | 293        | 123        | 234        | 148        | 4670907.3  |
|         | 3         | 371,215 (249±49)                 | 489   | 142,550              | 90         | 14         | 50         | 22         | 44         | 28         | 4670904.3  |
| S3      | 1         | 1,543,881 (239±49)               | 1,755 | 487,420              | 442        | 65         | 108        | 63         | 49         | 39         | 4670905.3  |
|         | 2         | 1,531,818 (247±46)               | 1,998 | 660,247              | 374        | 81         | 170        | 102        | 48         | 70         | 4670900.3  |
|         | 3         | 2,029,359 (237±47)               | 2,092 | 809,440              | 649        | 116        | 217        | 121        | 88         | 74         | 4670908.3  |
| S4      | 1         | 1,455,107 (248±47)               | 1,818 | 590,835              | 353        | 92         | 193        | 93         | 110        | 100        | 4670902.3  |
|         | 2         | 1,265,633 (241±47)               | 1,315 | 503,799              | 288        | 54         | 181        | 86         | 63         | 90         | 4670901.3  |
|         | 3         | 1,142,066 (244±48)               | 1,296 | 435,977              | 264        | 40         | 141        | 78         | 68         | 64         | 4670903.3  |

<sup>a</sup> ave. ± std.
